# Supplementary material for: Decoration of upconversion nanoparticles@mSiO2 core–shell nanostructures with CdS nanocrystals for excellent infrared light triggered photocatalysis
Source: Royal Society of Chemistry journal article supplement (doi:10.1039/c6ra09261f), 2016-01-01
Supplement: c6ra09261f1.pdf [file c6ra09261f1.pdf]

*Supporting Information*

Decoration of upconversion nanoparticles@mSiO<sub>2</sub> core-shell nanostructures  
with CdS nanocrystals for excellent infrared triggered photocatalysis

Yao-Wu Li,<sup>a</sup> Liang Dong,<sup>b</sup> Chen-Xi Huang,<sup>a</sup> Yan-Chuan Guo,<sup>\*,c</sup> Xian-Zhu Yang,<sup>a</sup> Yun-Jun Xu,<sup>\*,d</sup> Hai-Sheng Qian<sup>\*,a</sup>

<sup>a</sup> *School of Biological and Medical Engineering, Hefei University of Technology, Hefei 230009, P. R. China.*

<sup>b</sup> *Technical Institute of Physics and Chemistry, Chinese Academy of Sciences, Beijing 100190, China.*

<sup>c</sup> *Division of Nanomaterials and Chemistry, Hefei National Laboratory for Physical Sciences at Microscale, Department of Chemistry, University of Science and Technology of China, Hefei, Anhui 230026, P. R. China.*

<sup>d</sup> *Department of Radiology, Anhui Provincial Hospital, Hefei 230001, P. R. China*

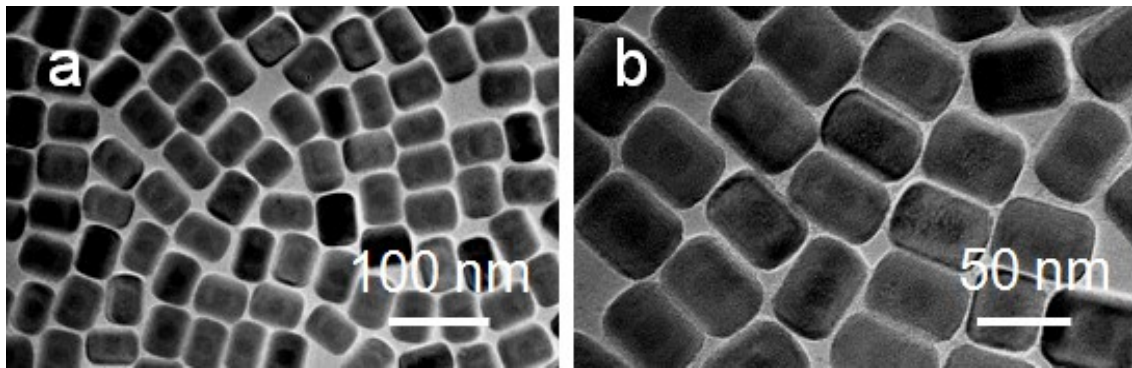

**Fig. S1.** (a, b) TEM images of NaYF<sub>4</sub>:Yb/Tm@NaYF<sub>4</sub> core-shell nanoparticles.

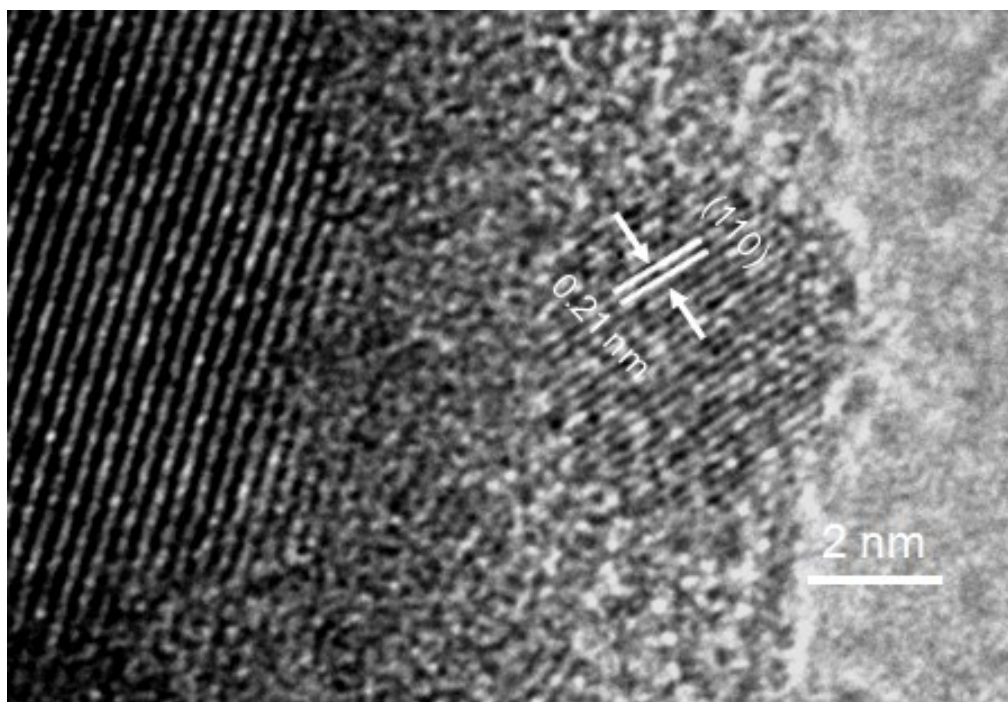

**Fig. S2.** High resolution transmission electron microscopy (HRTEM) images of selected edge of the  $\text{NaYF}_4:\text{Yb/Tm}@\text{NaYF}_4@\text{mSiO}_2/\text{CdS}$  nanoparticle shown in Fig. 1d.

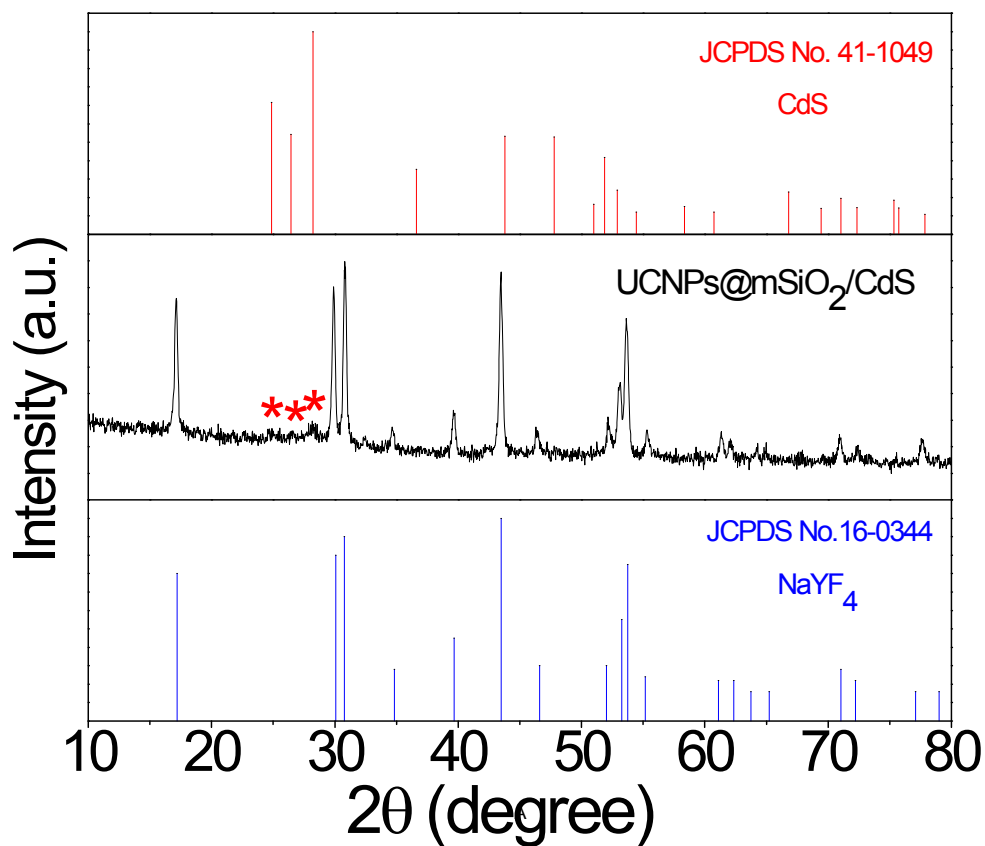

**Fig. S3.** X-rays diffraction pattern of the as-prepared NaYF<sub>4</sub>:Yb/Tm@NaYF<sub>4</sub>@mSiO<sub>2</sub>/CdS nanoparticles obtained from the reaction of 0.16 mmol cadmium acetate and 0.32 mmol thiourea in the presence of 0.045 g NaYF<sub>4</sub>:Yb/Tm@NaYF<sub>4</sub>@SiO<sub>2</sub> after calcination at 500 °C for 2 h.

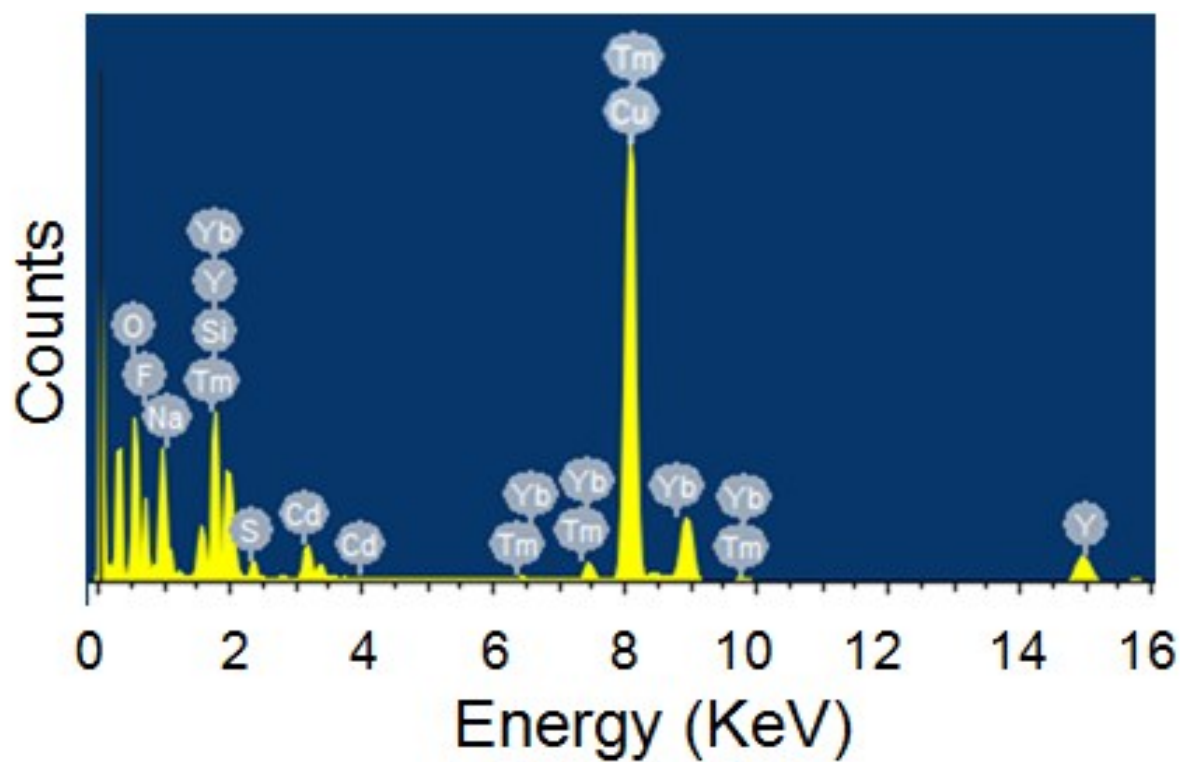

**Fig. S4.** Energy Dispersive X-ray analysis (EDX) of the as-prepared  $\text{NaYF}_4:\text{Yb}/\text{Tm}@ \text{NaYF}_4@m\text{SiO}_2/\text{CdS}$  nanoparticles.

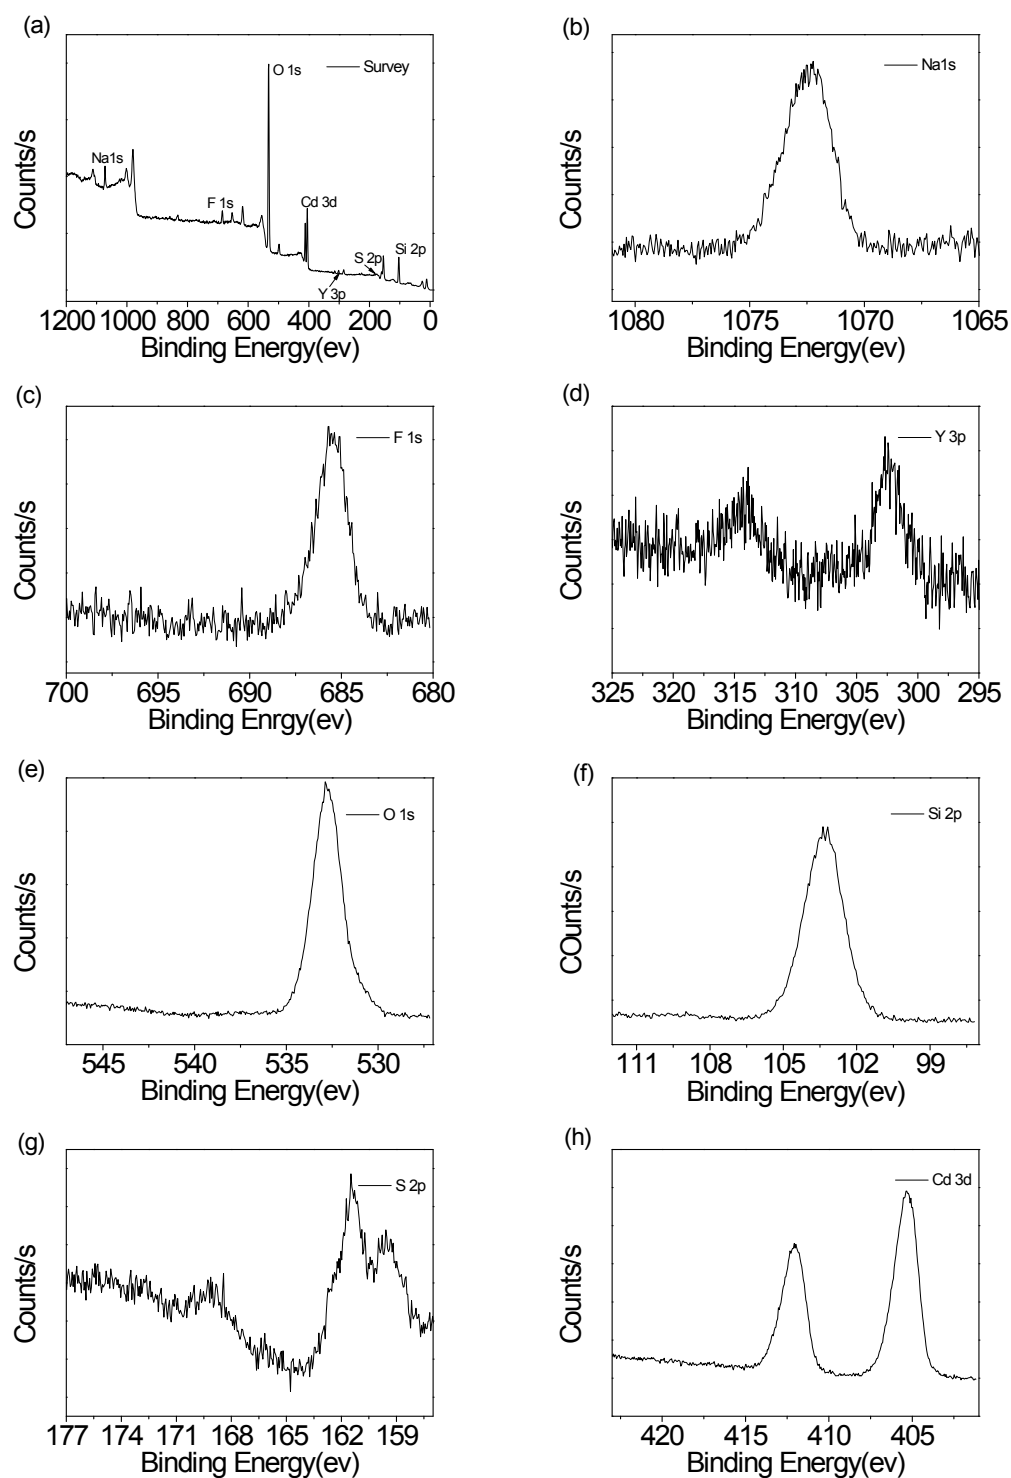

**Fig. S5.** X-ray photoelectron spectra (XPS) of the as-prepared  $\text{NaYF}_4:\text{Yb/Tm}@m\text{SiO}_2/\text{CdS}$  obtained from the reaction of 0.16 mmol cadmium acetate and 0.32 mmol thiourea in the presence of 0.045 g  $\text{NaYF}_4:\text{Yb/Tm}@m\text{SiO}_2$  after calcination at 500 °C for 2 h : (a) survey spectrum; (b) Na 1s; (c) F 1s; (d) Y 3p; (e) O 1s; (f) Si 2p; (g) S 2p; (h) Cd 3d.

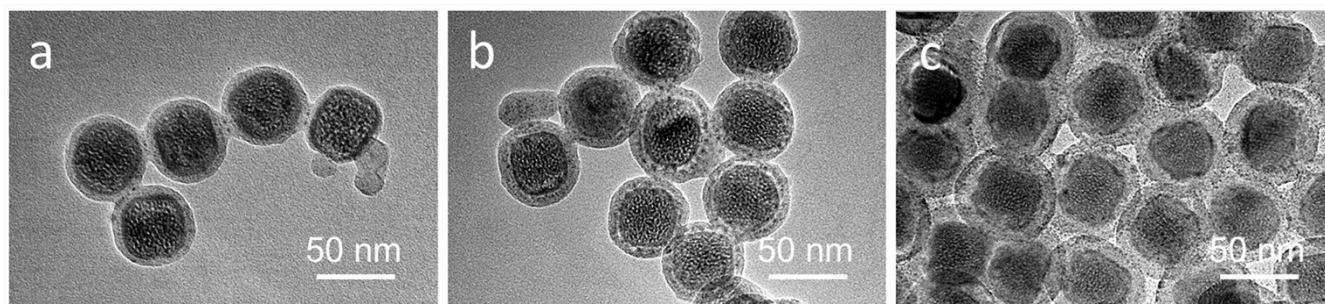

**Fig. S6.** TEM images of NaYF<sub>4</sub>:Yb/Tm@NaYF<sub>4</sub>@mSiO<sub>2</sub>/CdS nanoparticles with different thickness of silica layers: 3 nm (a); 7 nm (b); (c) TEM images of the NaYF<sub>4</sub>:Yb/Tm@NaYF<sub>4</sub>@mSiO<sub>2</sub>/CdS obtained from 0.32 mmol cadmium acetate and 0.64 mmol thiourea.

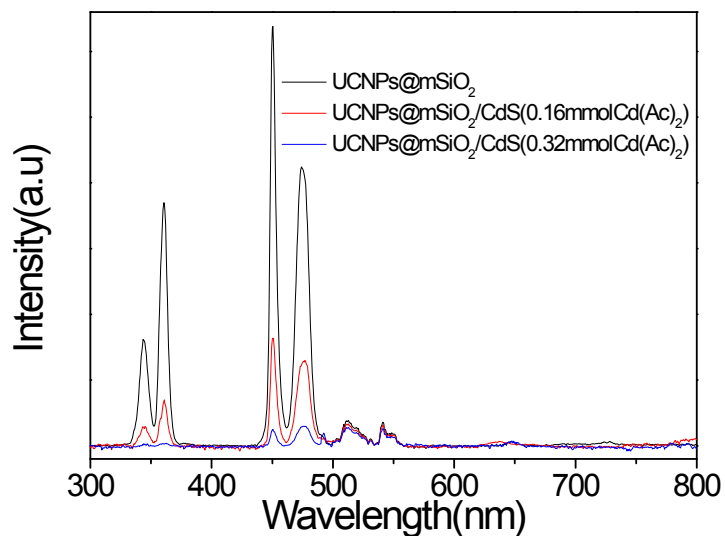

**Fig. S7.** Fluorescence spectra of the as-prepared NaYF<sub>4</sub>:Yb/Tm@NaYF<sub>4</sub>@mSiO<sub>2</sub>, NaYF<sub>4</sub>:Yb/Tm@NaYF<sub>4</sub>@mSiO<sub>2</sub>/CdS obtained from 0.16 mmol Cd(Ac)<sub>2</sub> and 0.32 mmol thiourea and NaYF<sub>4</sub>:Yb/Tm@NaYF<sub>4</sub>@mSiO<sub>2</sub>/CdS obtained from 0.32 mmol Cd(Ac)<sub>2</sub> and 0.64 mmol thiourea.

**Table S1.**Element composition of the as-prepared NaYF<sub>4</sub>:Yb/Tm@NaYF<sub>4</sub>@mSiO<sub>2</sub>/CdS nanoparticles from EDX analyses.

| Element | Weight % | Atomic % |
|---------|----------|----------|
| C       | 14.64    | 36.73    |
| O       | 11.10    | 20.91    |
| F       | 6.31     | 10.02    |
| Na      | 2.42     | 3.18     |
| S       | 3.15     | 2.96     |
| Si      | 25.56    | 16.09    |
| Y       | 15.86    | 5.38     |
| Cd      | 11.51    | 3.09     |
| Tm      | 2.01     | 0.36     |
| Yb      | 7.44     | 1.30     |
| Totals  | 100      |          |
